# Supplementary material
Source: MDPI journal article supplement (https://www.mdpi.com/2311-7524/7/5/97)
Supplement: s1 [file s1]

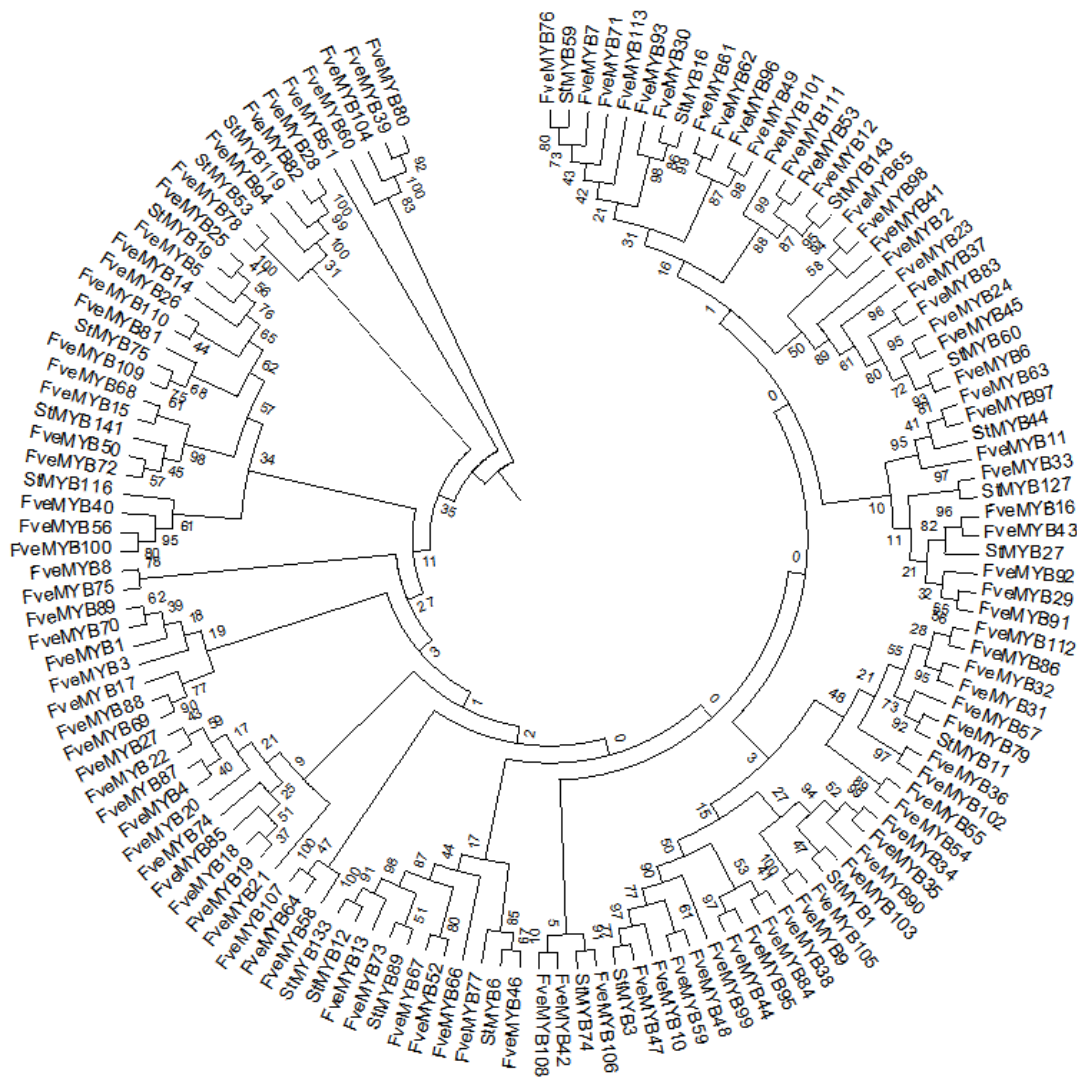

**Figure S2.** The phylogenetic tree of 2R-MYB proteins from woodland strawberry and potato. the protein sequences of 21 2R-StMYBs used in potato tissue expression [56], and combined them with the protein sequences of 113 2R-FveMYBs to construct a phylogenetic tree. the phylogenetic tree was created by MEGA 6.0 using the NJ (Neighbor-Joining) method, and the bootstrap test was repeated 1000 times.
