# Supplementary material
Source: MDPI journal article supplement (https://www.mdpi.com/2311-7524/7/5/97)
Supplement: s1 [file s1]

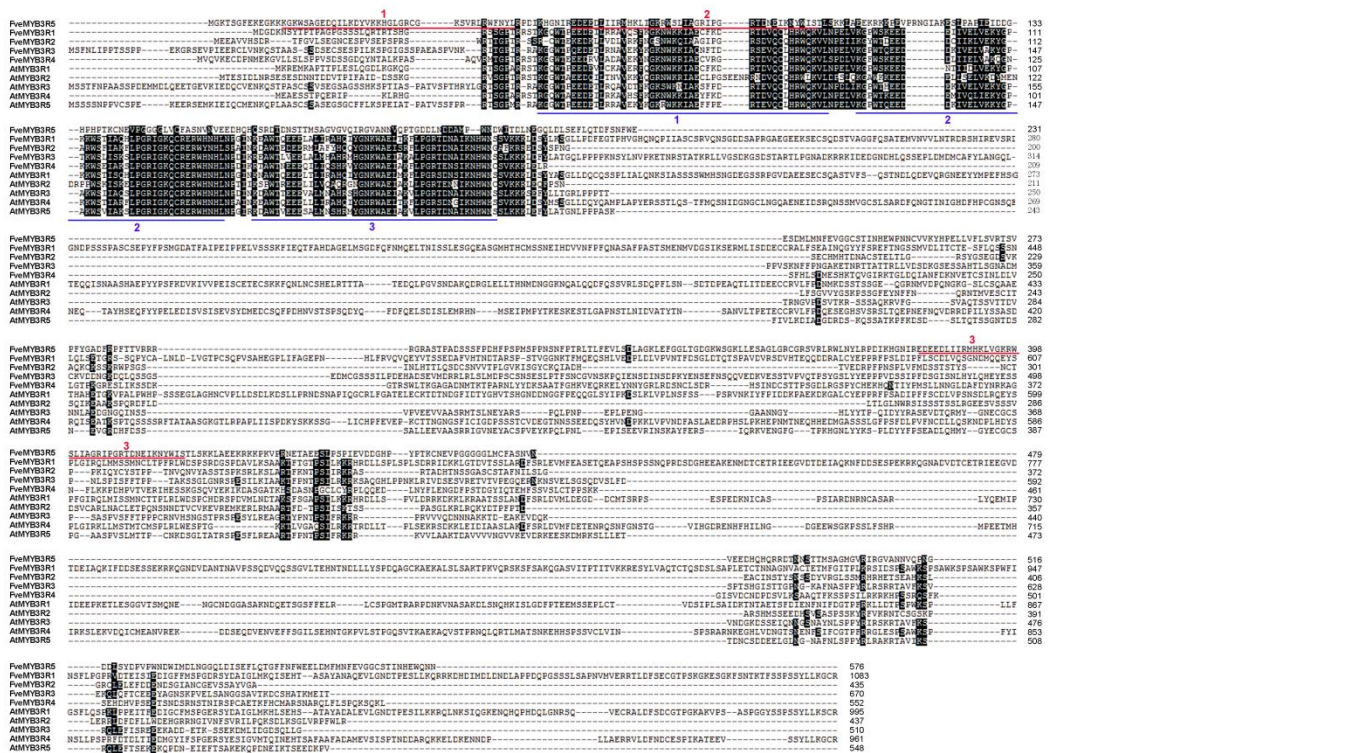

**Figure S1.** Multiple alignment of 10 3R-MYB protein sequences in Arabidopsis and woodland strawberry. The red line marks the 3 repeats in the *FveMYB3R5* protein. The blue line marks 3 repeats of the other 9 3R-MYB proteins.
